# Supplementary material for: Parental Height Differences Predict the Need for an Emergency Caesarean Section
Source: PLoS One. 2011 Jun 29;6(6):e20497. doi: 10.1371/journal.pone.0020497 (PMC3126796; doi:10.1371/journal.pone.0020497)
Supplement: Table S3 — Logistic regression parameter estimates (± s.e.) of the effects of maternal height, height2, parental height differences (PHD), birth weight, their interactions, and control variables on the probability of an emergency Caesarean section. (DOC) [file pone.0020497.s006.doc]

Table S3.

| Intercept | 55.13 ± 16.75** | 121.60 ± 33.14*** |
| --- | --- | --- |
| Birth weight (kg) | 3.77 (± 1.83)* | 3.95*10-1 (± 2.68 *10-1) |
| Birth weight2 | 7.80*10-1 (± 8.34*10-2)*** | 7.80*10-1 (± 8.34*10-2)*** |
| Height (cm) | -7.55*10-1 (± 2.01*10-1)*** | -1.48 (± 3.99*10-1)*** |
| Height2 | 2.65*10-3 (± 6.25*10-4)*** | 4.63*10-3 (± 1.22*10-4)*** |
| Height * Birth Weight | -5.16*10-2 (± 1.12*10-2)*** | -3.24*10-2 (± 1.61*10-2)* |
| PHD (cm) |  | -2.51 (± 5.90 *10-1)*** |
| Height * PHD |  | 2.93*10-2 (± 7.21 *10-3)*** |
| Height2 * PHD |  | -8.83*10-5 (± 2.24 *10-5)*** |
| PHD * Birth weight |  | 4.88*10-2 (± 8.86 *10-3)*** |
| Age mother (yrs) | 1.02 *10-1 (± 1.01*10-2)*** | 1.08 *10-1 (± 1.29*10-2)*** |
| Age father (yrs) |  | 1.49*10-3 (± 1.04 *10-2) |
| Household incomeb |  |  |
| 3,100-10,400 £ | -5.32*10-1 (± 5.08*10-1) | -4.72*10-1 (± 5.60*10-1) |
| 10,400-20,800 £ | -4.70*10-1 (± 4.86*10-1) | -4.46*10-1 (± 5.37*10-1) |
| 20,800-31,200 £ | -4.49*10-1 (± 4.90*10-1) | -4.75*10-1 (± 5.41*10-1) |
| 31,200-52,000 £ | -5.05*10-1 (± 4.95*10-1) | -4.85*10-1 (± 5.46*10-1) |
| > 52,000 £ | -3.07*10-1 (± 4.10*10-1) | -2.79*10-1 (± 5.62*10-1) |
| Health motherc |  |  |
| Good | 1.79*10-1 (± 9.71*10-2) | 1.77*10-1 (± 1.02*10-1) |
| Fair | 3.37*10-1 (± 1.61*10-1)* | 3.77*10-1 (± 1.67*10-1)* |
| Poor | 5.06*10-1 (± 3.43*10-1) | 4.51*10-1 (± 3.59*10-1) |
| Health fatherc |  |  |
| Good |  | 9.66*10-3 (± 1.01*10-1) |
| Fair |  | -1.19*10-2 (± 1.70*10-1) |
| Poor |  | -8.80*10-1 (± 4.78*10-1) |
| NS-SEC motherd |  |  |
| Intermediate occupations | 1.42*10-1 (± 1.26*10-1) | 1.96*10-1 (± 1.31*10-1) |
| Small employers and own account workers | -1.03*10-1 (± 2.63*10-1) | -3.10*10-3 (± 2.74*10-1) |
| Lower supervisory and technical occupations | 3.06*10-1 (± 2.23*10-1) | 1.12*10-1 (± 2.30*10-1) |
| Semi-routine and routine occupations /  Never worked and long-term unemployed | 6.52*10-2 (± 1.43*10-1) | 1.20*10-1 (± 1.49*10-1) |
| NS-SEC fatherd |  |  |
| Intermediate occupations |  | -1.59*10-1 (± 2.13*10-1) |
| Small employers and own account workers |  | -3.32*10-2 (± 1.79*10-1) |
| Lower supervisory and technical occupations |  | -3.86*10-2 (± 1.49*10-1) |
| Semi-routine and routine occupations /  Never worked and long-term unemployed |  | 3.45*10-2 (± 1.48*10-1) |
| Education mothere |  |  |
| NVQ Level 1 | -6.76*10-2 (± 2.93*10-1) | -2.53*10-1 (± 3.14*10-1) |
| NVQ Level 2 | 3.08*10-1 (± 2.47*10-1) | -3.10*10-2 (± 2.63*10-1) |
| NVQ Level 3 | 7.78*10-3 (± 2.58*10-1) | -9.18*10-3 (± 2.75*10-1) |
| NVQ Level 4 | -6.26*10-3 (± 2.56*10-1) | -3.59*10-2 (± 2.74*10-1) |
| NVQ Level 5 | -6.38*10-2 (± 3.20*10-1) | -4.59*10-2 (± 3.48*10-1) |
| Education fathere |  |  |
| NVQ Level 1 |  | 3.64*10-3 (± 2.63*10-1) |
| NVQ Level 2 |  | 2.97*10-1 (± 2.01*10-1) |
| NVQ Level 3 |  | 3.62*10-1 (± 2.17*10-1) |
| NVQ Level 4 |  | 7.46*10-2 (± 2.21*10-1) |
| NVQ Level 5 |  | 1.43*10-1 (± 2.98*10-1) |
| Gestation time (days) | 1.68*10-3 (± 4.51*10-3) | 1.74*10-3 (± 4.69*10-3) |
| Sex babyf | -1.32*10-1 (± 8.97*10-2) | -1.50*10-1 (± 9.32*10-2) |
| N | 2,972 | 2,817 |

*p<0.05, **p<0.01, ***p<0.001 (significance based on Wald test statistic with df=1).

a This interaction was not significant (p>0.72)

b The reference category was income bin 0-3,100 £

c Self-perceived health. The reference category was ‘Excellent’

d The National Statistics Socio-economic Classification. The reference category was ‘managerial and professional occupations’ (<http://www.ons.gov.uk/about-statistics/classifications/current/ns-sec/index.html>)

e National Vocational Qualifications. The reference category was ‘none of these qualifications’ (<http://www.direct.gov.uk/en/EducationAndLearning/QualificationsExplained/DG_10039029>)

f The reference category was male
